# Supplementary material for: MicroRNA Transcriptomic Analysis of Heterosis during Maize Seed Germination
Source: PLoS One. 2012 Jun 27;7(6):e39578. doi: 10.1371/journal.pone.0039578 (PMC3384671; doi:10.1371/journal.pone.0039578)
Supplement: Table S3 — Novel miRNA target genes (target gene ID and Gene Ontology were listed). (XLS) [file pone.0039578.s003.xls]

## Sheet: Sheet1
miRNA ID	Target ID	5'-target sequence-3'	match pattern	3'-miRNA sequence-5'	score	pd score	MFE ratio	GO
zma-miRn1a-d	GRMZM5G847159_T01	UCUCUCCUUCAAUCCCUUCCCU	|xx|o||o||||||||o|||~~	AUCGGGGGAGUUAGGGGAGGUU	3.5	4	0.735729	metabolic process
	GRMZM2G075315_T01	AGCCUCCCUCGAUCCCCUCCUC	xox|o|||||o|||||||||~~	AUCGGGGGAGUUAGGGGAGGUU	3.5	4	0.823315	extracellular region
	GRMZM2G075315_T02	AGCCUCCCUCGAUCCCCUCCUC	xox|o|||||o|||||||||~~	AUCGGGGGAGUUAGGGGAGGUU	3.5	4	0.823315	extracellular region
	GRMZM2G034551_T01	UAGCCCCUCCAAUCCCCUCCGG	|||||||ox|||||||||||~~	AUCGGGGGAGUUAGGGGAGGUU	1.5	1.5	0.814338	membrane
	GRMZM2G016250_T01	ACUAACCCUCAAUCUCCUCCAA	~~xxx|||||||||o|||||||	AUCGGGGGAGUUAGGGGAGGUU	3.5	4	0.826667	macromolecule metabolic process
	AC155434.2_FGT003	UAGCUCUCUCAAUCUUCUUCAA	||||o|o|||||||oo||o|~~	AUCGGGGGAGUUAGGGGAGGUU	2.5	4	0.911548
	GRMZM2G377123_T01	AAACUCCCUCAAUCCUCUUCAC	~|x|o||||||||||o||o||~	AUCGGGGGAGUUAGGGGAGGUU	2.5	3.5	0.841743	cytoplasm
	GRMZM2G050705_T01	AAACCCACUCAAUCCACUCCAA	~|x|||x||||||||x|||||~	AUCGGGGGAGUUAGGGGAGGUU	3	4	0.736486	metabolic process
	GRMZM2G050705_T02	AAACCCACUCAAUCCACUCCAA	~|x|||x||||||||x|||||~	AUCGGGGGAGUUAGGGGAGGUU	3	4	0.736486	metabolic process
	GRMZM2G008123_T01	CAUCUGCUUCGAUCCCCUCCAA	~|x|ox|o||o||||||||||~	AUCGGGGGAGUUAGGGGAGGUU	3.5	4	0.748428	macromolecule metabolic process
	GRMZM2G008123_T02	CAUCUGCUUCGAUCCCCUCCAA	~|x|ox|o||o||||||||||~	AUCGGGGGAGUUAGGGGAGGUU	3.5	4	0.748428	macromolecule metabolic process
	GRMZM2G008123_T03	CAUCUGCUUCGAUCCCCUCCAA	~|x|ox|o||o||||||||||~	AUCGGGGGAGUUAGGGGAGGUU	3.5	4	0.748428	macromolecule metabolic process
	GRMZM2G008123_T05	CAUCUGCUUCGAUCCCCUCCAA	~|x|ox|o||o||||||||||~	AUCGGGGGAGUUAGGGGAGGUU	3.5	4	0.748428	macromolecule metabolic process
	GRMZM2G049068_T01	AAUCCGUAUCAAUCCCCUCCAA	~|x||xox|||||||||||||~	AUCGGGGGAGUUAGGGGAGGUU	3.5	3.5	0.759009	Transcribed locus
	GRMZM2G329901_T01	GAGCCUCUUGAAUCCCCUCCAA	~||||o|o|x|||||||||||~	AUCGGGGGAGUUAGGGGAGGUU	2	3	0.863636
	GRMZM2G083398_T01	UGGUUGUCUCAAUCCCUUCCAU	|o|ooxo|||||||||o|||~~	AUCGGGGGAGUUAGGGGAGGUU	3.5	4	0.825503
	GRMZM5G857369_T01	AAACCCCCUCAAUCCCCCUCAA	~|x||||||||||||||xo||~	AUCGGGGGAGUUAGGGGAGGUU	2.5	4	0.785714
	GRMZM2G012273_T01	UCUUUUCCUCAAUCCCCUCCAC	|xxooo||||||||||||||~~	AUCGGGGGAGUUAGGGGAGGUU	3.5	3.5	0.827887
	GRMZM2G181415_T01	GCGCCCCCUGAAUUCCCUCCAC	~x|||||||x|||o|||||||~	AUCGGGGGAGUUAGGGGAGGUU	2.5	4	0.803774
	GRMZM2G356839_T01	GAGCACCCUCAAUCCCCUCUAA	~|||x||||||||||||||o|~	AUCGGGGGAGUUAGGGGAGGUU	1.5	2	0.87037
	GRMZM5G874430_T01	CAGCUUCCUCGAUUUCCUCCAC	~|||oo||||o||oo||||||~	AUCGGGGGAGUUAGGGGAGGUU	2.5	4	0.850972
	GRMZM2G098331_T01	UAGUUCCUUCAAUCCCCUCCGA	|||oo||o||||||||||||~~	AUCGGGGGAGUUAGGGGAGGUU	1.5	1.5	0.927039	transport
	GRMZM2G098331_T02	UAGUUCCUUCAAUCCCCUCCGA	|||oo||o||||||||||||~~	AUCGGGGGAGUUAGGGGAGGUU	1.5	1.5	0.927039	transport
	GRMZM2G108739_T01	CAGCCCUCUCAAUCCCCUCCAU	~|||||o||||||||||||||~	AUCGGGGGAGUUAGGGGAGGUU	0.5	0.5	0.954545	macromolecule metabolic process
	GRMZM2G108739_T02	CAGCCCUCUCAAUCCCCUCCAU	~|||||o||||||||||||||~	AUCGGGGGAGUUAGGGGAGGUU	0.5	0.5	0.954545	macromolecule metabolic process
	GRMZM2G128074_T01	AAUCCUCCUCAAUCCCUUCCAA	~|x||o||||||||||o||||~	AUCGGGGGAGUUAGGGGAGGUU	2	2.5	0.886414
	GRMZM2G093902_T01	UAGGCCCUUCAAUCUCCUCUGC	|||x|||o||||||o||||o~~	AUCGGGGGAGUUAGGGGAGGUU	2.5	3.5	0.77732
	GRMZM2G093902_T02	UAGGCCCUUCAAUCUCCUCUGC	|||x|||o||||||o||||o~~	AUCGGGGGAGUUAGGGGAGGUU	2.5	3.5	0.77732
	GRMZM2G165629_T02	AAACCCACUCAAUUCCUUCCAA	~|x|||x||||||o||o||||~	AUCGGGGGAGUUAGGGGAGGUU	3	4	0.813842	transport
	GRMZM2G152599_T02	UUUCCCUUUCAAUUCCUUCCAA	~~x|||oo|||||o||o|||||	AUCGGGGGAGUUAGGGGAGGUU	3	4	0.866499
	GRMZM2G075496_T02	UCGCUCUCUCAAUUCUCUCCCG	|x||o|o||||||o|o||||~~	AUCGGGGGAGUUAGGGGAGGUU	3	4	0.757962	metabolic process
	GRMZM2G075496_T04	UCGCUCUCUCAAUUCUCUCCCG	|x||o|o||||||o|o||||~~	AUCGGGGGAGUUAGGGGAGGUU	3	4	0.757962	metabolic process
	GRMZM2G110735_T01	UGUCCUCCUCAAUUUCCUCCAA	~~x||o|||||||oo|||||||	AUCGGGGGAGUUAGGGGAGGUU	2.5	3.5	0.834821	metabolic process
	GRMZM2G053284_T01	UAACUCCUUCAAUUCCUUCCGG	||x|o||o|||||o||o|||~~	AUCGGGGGAGUUAGGGGAGGUU	3	4	0.793911	binding
	GRMZM2G077937_T01	UAGCCCCCUCGAUCUCCUUCAU	||||||||||o|||o|||o|~~	AUCGGGGGAGUUAGGGGAGGUU	1.5	3	0.922764	response to stimulus
	GRMZM2G039622_T01	UUUCCACCUCAAUCUUCUCCAA	~~x||x||||||||oo||||||	AUCGGGGGAGUUAGGGGAGGUU	3	4	0.807059
	GRMZM2G137829_T01	UAGCCUCUUCAAUCCUCUGCAG	|||||o|o|||||||o||x|~~	AUCGGGGGAGUUAGGGGAGGUU	2.5	4	0.832972
	GRMZM2G314064_T01	CUUCUCUCUCGAUCCUCUCCAA	~~x|o|o|||o||||o||||||	AUCGGGGGAGUUAGGGGAGGUU	3	4	0.788671	transcription regulator activity
	GRMZM2G346865_T01	GUCCCCCCUCAAUUCUCUCCAA	~~x||||||||||o|o||||||	AUCGGGGGAGUUAGGGGAGGUU	2	3	0.822314
	GRMZM2G346865_T02	GUCCCCCCUCAAUUCUCUCCAA	~~x||||||||||o|o||||||	AUCGGGGGAGUUAGGGGAGGUU	2	3	0.822314
	GRMZM5G839763_T01	AAACCUCUUCAAUCCCCUCCUA	x|x||o|o||||||||||||~~	AUCGGGGGAGUUAGGGGAGGUU	3	3	0.854911	protein binding
	GRMZM2G045544_T01	UAGCCCCCUCAAUCCCCUCUAU	|||||||||||||||||||o~~	AUCGGGGGAGUUAGGGGAGGUU	0.5	1	0.987976
	GRMZM2G047949_T01	UAGCUCCCUCAAUCCUCUCUGU	||||o||||||||||o|||o~~	AUCGGGGGAGUUAGGGGAGGUU	1.5	2.5	0.890756	helicase activity
	GRMZM2G069923_T01	UCGCCGCCUCAAUUCCCUCCUC	|x|||x|||||||o||||||~~	AUCGGGGGAGUUAGGGGAGGUU	2.5	3	0.776265
	GRMZM2G380668_T01	UAGCCCCUCCAAUCCCCUCUGG	|||||||ox||||||||||o~~	AUCGGGGGAGUUAGGGGAGGUU	2	2.5	0.786389	dicarboxylic acid transport
	GRMZM2G025171_T01	CAACCCCCUCAGUCCUCUCCGC	~|x||||||||o|||o||||o~	AUCGGGGGAGUUAGGGGAGGUU	2.5	4	0.789077	ATP synthase delta chain
	GRMZM2G025171_T02	CAACCCCCUCAGUCCUCUCCGC	~|x||||||||o|||o||||o~	AUCGGGGGAGUUAGGGGAGGUU	2.5	4	0.789077	ATP synthase delta chain
	GRMZM2G053023_T01	AAACCUCUUCAAUCCCCUUCUA	x|x||o|o||||||||||o|~~	AUCGGGGGAGUUAGGGGAGGUU	3.5	4	0.834906	thioredoxin H-type 5
	GRMZM2G050693_T01	AAACUCACUCAAUCCCCUCCAA	~|x|o|x||||||||||||||~	AUCGGGGGAGUUAGGGGAGGUU	2.5	2.5	0.82287	No
	GRMZM2G050693_T02	AAACUCACUCAAUCCCCUCCAA	~|x|o|x||||||||||||||~	AUCGGGGGAGUUAGGGGAGGUU	2.5	2.5	0.82287	No
	GRMZM2G050693_T03	AAACUCACUCAAUCCCCUCCAA	~|x|o|x||||||||||||||~	AUCGGGGGAGUUAGGGGAGGUU	2.5	2.5	0.82287	No
	GRMZM2G106389_T01	ACUUUCCCUCAAUCCCCUCCUA	~~xoo|||||||||||||||x|	AUCGGGGGAGUUAGGGGAGGUU	3	4	0.830508	protein serine/threonine kinase activity
	GRMZM2G124802_T03	UACGCUCCUCAAUCCCCUCCUC	||xx|o||||||||||||||~~	AUCGGGGGAGUUAGGGGAGGUU	2.5	2.5	0.761431	No
	GRMZM2G150772_T01	AAGUCCGAUCAAUCCUCUCCAC	~||o||xx|||||||o|||||~	AUCGGGGGAGUUAGGGGAGGUU	3	3.5	0.791667	No
	GRMZM2G150772_T02	AAGUCCGAUCAAUCCUCUCCAC	~||o||xx|||||||o|||||~	AUCGGGGGAGUUAGGGGAGGUU	3	3.5	0.791667	No
	GRMZM2G033379_T02	UAUCCCCUCCAAUCCCCUCCGG	||x||||ox|||||||||||~~	AUCGGGGGAGUUAGGGGAGGUU	2.5	2.5	0.753817	heat shock protein binding
	GRMZM2G135651_T01	UAGCCCCUCCAAUUCUCUCCAU	|||||||ox||||o|o||||~~	AUCGGGGGAGUUAGGGGAGGUU	2.5	3.5	0.820675	ion transport
	GRMZM5G862488_T01	UUGUCUCCUCAAUCCUUUCCCU	|x|o|o|||||||||oo|||~~	AUCGGGGGAGUUAGGGGAGGUU	3	4	0.805804	nicotinate phosphoribosyltransferase activity
	GRMZM2G004784_T01	UAGCCCCUCCAACCCCCUCCAU	|||||||ox|||x|||||||~~	AUCGGGGGAGUUAGGGGAGGUU	2.5	3.5	0.745826	No
	GRMZM2G098577_T03	UAGCCCCCUCAAUCCCCUUCAU	||||||||||||||||||o|~~	AUCGGGGGAGUUAGGGGAGGUU	0.5	1	0.983838	RNA metabolic process
	GRMZM2G098577_T04	UAGCCCCCUCAAUCCCCUUCAU	||||||||||||||||||o|~~	AUCGGGGGAGUUAGGGGAGGUU	0.5	1	0.983838	RNA metabolic process
	GRMZM2G042295_T01	UUUCUCCUUCAAUUCUCUCCAA	~~x|o||o|||||o|o||||||	AUCGGGGGAGUUAGGGGAGGUU	3	4	0.841191	No
	GRMZM2G136700_T01	AAUUUCUCUCAAUCCCCUCCAA	~|xoo|o||||||||||||||~	AUCGGGGGAGUUAGGGGAGGUU	2.5	2.5	0.896471	response to freezing
	GRMZM2G051752_T01	UUCCUACCUCAAUCCUCUCCAA	~~x|ox|||||||||o||||||	AUCGGGGGAGUUAGGGGAGGUU	3	3.5	0.788079	No
	GRMZM2G077233_T03	UAGCUCUUUCAAUCUUCUCCAA	||||o|oo||||||oo||||~~	AUCGGGGGAGUUAGGGGAGGUU	2.5	3.5	0.928218	lipid metabolic process
	GRMZM2G077233_T04	UAGCUCUUUCAAUCUUCUCCAA	||||o|oo||||||oo||||~~	AUCGGGGGAGUUAGGGGAGGUU	2.5	3.5	0.928218	lipid metabolic process
	GRMZM5G819212_T01	AAUCCCCCUCAAUUCUCUCCGA	~|x||||||||||o|o||||o~	AUCGGGGGAGUUAGGGGAGGUU	2.5	4	0.841202	No
	GRMZM5G819212_T02	AAUCCCCCUCAAUUCUCUCCGA	~|x||||||||||o|o||||o~	AUCGGGGGAGUUAGGGGAGGUU	2.5	4	0.841202	No
	GRMZM2G152419_T01	UUUCUCCCUCAGUCCCCUUCAA	~~x|o||||||o||||||o|||	AUCGGGGGAGUUAGGGGAGGUU	2.5	3.5	0.840764	proteolysis
	GRMZM2G000741_T01	AAUCCGUAUCAAUCCCCUCCAA	~|x||xox|||||||||||||~	AUCGGGGGAGUUAGGGGAGGUU	3.5	3.5	0.759009	transport
	GRMZM2G057369_T01	CGCCUUCCUCAAUCCCUUCCAA	~~x|oo||||||||||o|||||	AUCGGGGGAGUUAGGGGAGGUU	2.5	3	0.855932	chromatin assembly or disassembly
	GRMZM2G144843_T01	CAGCCUCCUCCAUCCCCUCCGC	~||||o||||x|||||||||o~	AUCGGGGGAGUUAGGGGAGGUU	2	3.5	0.780576	Pentatricopeptide repeat protein PPR986-12
	GRMZM2G368041_T01	AAUCCAUAUCAAUCCCCUCCAA	~|x||xox|||||||||||||~	AUCGGGGGAGUUAGGGGAGGUU	3.5	3.5	0.809302	protein transport
	GRMZM2G102616_T01	AAUCCAUAUCAAUCCCCUCCAA	~|x||xox|||||||||||||~	AUCGGGGGAGUUAGGGGAGGUU	3.5	3.5	0.809302	No
	GRMZM2G055116_T01	UAGCCCCUUCAAUUCUCUCCGG	|||||||o|||||o|o||||~~	AUCGGGGGAGUUAGGGGAGGUU	1.5	2.5	0.894737	No
	GRMZM2G133444_T01	UUUCCCCCUCAAUCCCCUCCGA	~~x|||||||||||||||||o|	AUCGGGGGAGUUAGGGGAGGUU	1.5	2	0.884314	No
	GRMZM2G100246_T01	AACCCCCCUCAAUCUCCUUUAU	~|x|||||||||||o|||oo|~	AUCGGGGGAGUUAGGGGAGGUU	2.5	4	0.838926	transcription regulator activity
	GRMZM2G052474_T02	UACGCUCCUCAGUCCCCUCCGA	||xx|o|||||o||||||||~~	AUCGGGGGAGUUAGGGGAGGUU	3	3.5	0.752363	No
	GRMZM2G381453_T06	UAGCCCUUUCAAUCCCCUCUGG	||||||oo|||||||||||o~~	AUCGGGGGAGUUAGGGGAGGUU	1.5	2	0.891892	transport
	GRMZM2G130374_T01	CUCCCUCCUCGAUCCCCUCCAC	~xx||o||||o||||||||||~	AUCGGGGGAGUUAGGGGAGGUU	3	3.5	0.783985	regulation of transcription
	GRMZM2G144153_T01	UUUCCCCCUUAAUCCCCUUCAA	~~x||||||o||||||||o|||	AUCGGGGGAGUUAGGGGAGGUU	2	3	0.90583	response to oxidative stress
	GRMZM2G333875_T01	UUUCUCUCUCAAUUCCCUCCAU	|xx|o|o||||||o||||||~~	AUCGGGGGAGUUAGGGGAGGUU	3.5	4	0.850467	protein serine/threonine kinase activity
	GRMZM2G134753_T01	AAUCCUCCUCAAUCUCCUUCAA	~|x||o||||||||o|||o||~	AUCGGGGGAGUUAGGGGAGGUU	2.5	3.5	0.85514	No
	GRMZM2G134753_T02	AAUCCUCCUCAAUCUCCUUCAA	~|x||o||||||||o|||o||~	AUCGGGGGAGUUAGGGGAGGUU	2.5	3.5	0.85514	No
	GRMZM2G141299_T01	GCCCGCCUUCAAUCCCCUCCAU	~xx|x||o|||||||||||||~	AUCGGGGGAGUUAGGGGAGGUU	3.5	3.5	0.805395	transcription factor activity
	GRMZM2G075122_T01	CCGGGCCCCCAAUCCCUUCCAA	~~|xx|||x|||||||o|||||	AUCGGGGGAGUUAGGGGAGGUU	3.5	4	0.734201	No
	GRMZM2G060284_T03	AAGUACCCACAAUCCUCUCCAC	~||ox|||x||||||o|||||~	AUCGGGGGAGUUAGGGGAGGUU	3	3.5	0.73913	RNA polymerase II transcription factor activity
	GRMZM2G149104_T01	UGGCCUCGUCGAUCCCUUCCCA	|o|||o|x||o|||||o|||~~	AUCGGGGGAGUUAGGGGAGGUU	3	4	0.737643	No
	GRMZM2G109464_T01	UAGCCCCUUCAAUCCUCUCCAU	|||||||o|||||||o||||~~	AUCGGGGGAGUUAGGGGAGGUU	1	1.5	0.968354	Zinc finger protein
	GRMZM2G109464_T02	UAGCCCCUUCAAUCCUCUCCAU	|||||||o|||||||o||||~~	AUCGGGGGAGUUAGGGGAGGUU	1	1.5	0.968354	Zinc finger protein
	GRMZM2G149383_T01	UUUCUACCUCAAUCCUCUCCAA	~~x|ox|||||||||o||||||	AUCGGGGGAGUUAGGGGAGGUU	3	3.5	0.794872	No
	GRMZM2G149383_T02	UUUCUACCUCAAUCCUCUCCAA	~~x|ox|||||||||o||||||	AUCGGGGGAGUUAGGGGAGGUU	3	3.5	0.794872	No
	GRMZM2G163418_T01	AAUCCCCCUCAAUCCACUCCAA	~|x||||||||||||x|||||~	AUCGGGGGAGUUAGGGGAGGUU	2	3	0.81741	transcription factor activity
zma-miRn3	GRMZM2G072614_T01	UUUGCCUCUCCAGUCUCCUCC	||x|||o|||||o|||||||~	AAUCGGGGAGGUUAGAGGAGG	2	2.5	0.873418	No
	GRMZM2G034551_T01	UUAGCCCCUCCAAUCCCCUCC	|||||||||||||||x||||~	AAUCGGGGAGGUUAGAGGAGG	1	2	0.859155	zinc ion transmembrane transporter activity
	GRMZM2G057186_T01	GAAGCCCGUCCGAUCUCCUCU	~x|||||x|||o||||||||o	AAUCGGGGAGGUUAGAGGAGG	3	3.5	0.834711	No
	GRMZM2G057186_T03	GAAGCCCGUCCGAUCUCCUCU	~x|||||x|||o||||||||o	AAUCGGGGAGGUUAGAGGAGG	3	3.5	0.834711	catalytic activity
	GRMZM2G412793_T01	UAAGCCAAUCCAAUUUCCUCC	|x||||xx||||||o|||||~	AAUCGGGGAGGUUAGAGGAGG	3.5	4	0.870647	No
	GRMZM2G093344_T01	UUCGUUCUUCCAAUCUCCUUC	||x|oo|o|||||||||||o~	AAUCGGGGAGGUUAGAGGAGG	3	3.5	0.846348	No
	GRMZM2G577735_T01	CAAGCCAAUCCAAUUUCCUCC	~x||||xx||||||o||||||	AAUCGGGGAGGUUAGAGGAGG	3.5	4	0.853659	No
	GRMZM2G085885_T04	UCGGUCUCUCCAGUCUCCUCU	|xo|o|o|||||o|||||||~	AAUCGGGGAGGUUAGAGGAGG	3	3.5	0.817427	protein folding
	GRMZM2G085885_T05	UCGGUCUCUCCAGUCUCCUCU	|xo|o|o|||||o|||||||~	AAUCGGGGAGGUUAGAGGAGG	3	3.5	0.817427	protein folding
	GRMZM2G085885_T06	UCGGUCUCUCCAGUCUCCUCU	|xo|o|o|||||o|||||||~	AAUCGGGGAGGUUAGAGGAGG	3	3.5	0.817427	protein folding
	GRMZM5G830319_T01	UUUGCCUCUCCAGUCUCCUCC	||x|||o|||||o|||||||~	AAUCGGGGAGGUUAGAGGAGG	2	2.5	0.873418	No
	GRMZM2G146679_T01	UUGGUCCCUCCAGUCUCUUCU	||o|o|||||||o||||o||~	AAUCGGGGAGGUUAGAGGAGG	2	3	0.880952	No
	AC190841.2_FGT007	UUAGUCCCUCUAAUCUCCUUC	||||o|||||o||||||||o~	AAUCGGGGAGGUUAGAGGAGG	1.5	2.5	0.965937	No
	GRMZM2G098331_T01	UUAGUUCCUUCAAUCCCCUCC	||||oo|||o|||||x||||~	AAUCGGGGAGGUUAGAGGAGG	2.5	4	0.801402	transporter activity
	GRMZM2G098331_T02	UUAGUUCCUUCAAUCCCCUCC	||||oo|||o|||||x||||~	AAUCGGGGAGGUUAGAGGAGG	2.5	4	0.801402	No
	GRMZM2G093902_T01	UUAGGCCCUUCAAUCUCCUCU	||||x||||o||||||||||~	AAUCGGGGAGGUUAGAGGAGG	1.5	2	0.875	No
	GRMZM2G093902_T02	UUAGGCCCUUCAAUCUCCUCU	||||x||||o||||||||||~	AAUCGGGGAGGUUAGAGGAGG	1.5	2	0.875	No
	GRMZM2G078396_T01	UUAGCUCCUCCAAUCCCCUUG	|||||o|||||||||x|||o~	AAUCGGGGAGGUUAGAGGAGG	2	3.5	0.81069	60S ribosomal protein L23
	GRMZM2G078396_T02	UUAGCUCCUCCAAUCCCCUUG	|||||o|||||||||x|||o~	AAUCGGGGAGGUUAGAGGAGG	2	3.5	0.81069	translation
	GRMZM2G314647_T01	GUAAUCUCUCCAAUCUCCUUC	~||xo|o||||||||||||o|	AAUCGGGGAGGUUAGAGGAGG	2.5	3	0.824561	actin cytoskeleton
	GRMZM2G380668_T01	UUAGCCCCUCCAAUCCCCUCU	|||||||||||||||x||||~	AAUCGGGGAGGUUAGAGGAGG	1	2	0.85567	dicarboxylic acid transport
	GRMZM2G033379_T02	UUAUCCCCUCCAAUCCCCUCC	|||x|||||||||||x||||~	AAUCGGGGAGGUUAGAGGAGG	2	3	0.756813	heat shock protein binding
	GRMZM2G135651_T01	UUAGCCCCUCCAAUUCUCUCC	||||||||||||||oxo|||~	AAUCGGGGAGGUUAGAGGAGG	2	4	0.85177	ion channel activity
	GRMZM2G309152_T01	UUGACUCCUUCAAUCUUCUCU	||ox|o|||o||||||o|||~	AAUCGGGGAGGUUAGAGGAGG	3	4	0.779188	No
	GRMZM2G077233_T03	UUAGCUCUUUCAAUCUUCUCC	|||||o|o|o||||||o|||~	AAUCGGGGAGGUUAGAGGAGG	2	3	0.942559	proteolysis
	GRMZM2G077233_T04	UUAGCUCUUUCAAUCUUCUCC	|||||o|o|o||||||o|||~	AAUCGGGGAGGUUAGAGGAGG	2	3	0.942559	proteolysis
	GRMZM2G059496_T01	CUAGUCACUCCAAUUUCCUUC	~|||o|x|||||||o||||o|	AAUCGGGGAGGUUAGAGGAGG	2.5	3.5	0.82398	No
	GRMZM2G083738_T01	CUUCCGCCUCCGAUCUCCUCC	~|xx|x|||||o|||||||||	AAUCGGGGAGGUUAGAGGAGG	3.5	4	0.731313	RNA processing
	GRMZM2G179217_T01	GAAGUCCUUCCAAUCUUCUCC	~x||o||o||||||||o||||	AAUCGGGGAGGUUAGAGGAGG	2.5	3	0.911271	No
	GRMZM2G050709_T01	UUAGUCUCUCUAAUUUUCUCC	||||o|o|||o|||o|o|||~	AAUCGGGGAGGUUAGAGGAGG	2.5	4	0.939394	sugar binding
	GRMZM2G381453_T06	UUAGCCCUUUCAAUCCCCUCU	|||||||o|o|||||x||||~	AAUCGGGGAGGUUAGAGGAGG	2	3.5	0.82151	transport
	GRMZM2G057158_T01	UCAACCCCUCCAAUCUCUUUG	|x|x|||||||||||||o|o~	AAUCGGGGAGGUUAGAGGAGG	3	4	0.820331	No
	GRMZM2G133972_T01	UUAAUUCCUCCGAUCUUCUCA	|||xoo|||||o||||o|||~	AAUCGGGGAGGUUAGAGGAGG	3	4	0.8	transcription factor activity
	GRMZM2G133972_T02	UUAAUUCCUCCGAUCUUCUCA	|||xoo|||||o||||o|||~	AAUCGGGGAGGUUAGAGGAGG	3	4	0.8	transcription factor activity
	GRMZM2G474537_T01	GAAGUCCUUCCAAUCUUCUCC	~x||o||o||||||||o||||	AAUCGGGGAGGUUAGAGGAGG	2.5	3	0.911271	spermatogenesis
	GRMZM2G109464_T01	CUAGCCCCUUCAAUCCUCUCC	~||||||||o|||||xo||||	AAUCGGGGAGGUUAGAGGAGG	2	4	0.803456	Zinc finger protein
	GRMZM2G109464_T02	CUAGCCCCUUCAAUCCUCUCC	~||||||||o|||||xo||||	AAUCGGGGAGGUUAGAGGAGG	2	4	0.803456	Zinc finger protein
	GRMZM2G151223_T01	UUAGCCCGUCCAAUCCCCUUC	|||||||x|||||||x|||o~	AAUCGGGGAGGUUAGAGGAGG	2.5	4	0.76129	histidine kinase 1
zma-miRn4	GRMZM2G383240_T07	AUUUAAUCCUCUCCAAUCCCC	||||||||||||x|||||||~	UAAAUUAGGAGAAGUUAGGGG	1	2	0.832512	protein serine/threonine kinase activity
	GRMZM2G043445_T01	AUUUAAUCAUCUUUAAUCCCA	||||||||x||||o||||||~	UAAAUUAGGAGAAGUUAGGGG	1.5	3	0.858462	No
	GRMZM2G022538_T01	AUUUAAUCCCCUUCAAUCCCC	|||||||||x||||||||||~	UAAAUUAGGAGAAGUUAGGGG	1	2	0.826303	No
	GRMZM2G022538_T02	AUUUAAUCCCCUUCAAUCCCC	|||||||||x||||||||||~	UAAAUUAGGAGAAGUUAGGGG	1	2	0.826303	No
	GRMZM2G022538_T03	AUUUAAUCCCCUUCAAUCCCC	|||||||||x||||||||||~	UAAAUUAGGAGAAGUUAGGGG	1	2	0.826303	No
	GRMZM2G142437_T01	AUUUAAUCUUCUUCAAUCCCC	||||||||o|||||||||||~	UAAAUUAGGAGAAGUUAGGGG	0.5	1	0.99162	ATP binding
	GRMZM2G137829_T01	AUUUUAGCCUCUUCAAUCCUC	||||x|x||||||||||||o~	UAAAUUAGGAGAAGUUAGGGG	2.5	3	0.782152	No
	GRMZM2G053023_T01	UCUUAAACCUCUUCAAUCCCC	~x||||x||||||||||||||	UAAAUUAGGAGAAGUUAGGGG	2	2	0.806452	thioredoxin H-type 5
	GRMZM2G176307_T01	UUUUAAUCUACUUCAAUCCCU	~|||||||ox||||||||||o	UAAAUUAGGAGAAGUUAGGGG	2	3.5	0.861671	cation transmembrane transporter activity
	GRMZM5G883741_T01	AUUUUAUCCUCUUCAAUCCUU	||||x||||||||||||||o~	UAAAUUAGGAGAAGUUAGGGG	1.5	2	0.881503	No
	GRMZM5G883741_T02	AUUUUAUCCUCUUCAAUCCUU	||||x||||||||||||||o~	UAAAUUAGGAGAAGUUAGGGG	1.5	2	0.881503	No
	GRMZM2G162788_T01	AUAUAAUCCUCCUCAAUCCCU	||x||||||||x||||||||~	UAAAUUAGGAGAAGUUAGGGG	2	3	0.7775	Nitrate-induced NOI protein
	GRMZM2G162788_T02	AUAUAAUCCUCCUCAAUCCCU	||x||||||||x||||||||~	UAAAUUAGGAGAAGUUAGGGG	2	3	0.7775	Nitrate-induced NOI protein
	AC190623.3_FGT002	AUUAAUUCCUCUUCAAUCACU	|||x|x||||||||||||x|~	UAAAUUAGGAGAAGUUAGGGG	3	4	0.737752	No
	GRMZM2G006297_T01	AUUAAGUCCUCUUCAGUCCCA	|||x|o|||||||||o||||~	UAAAUUAGGAGAAGUUAGGGG	2	2.5	0.802885	No
	GRMZM2G006297_T02	AUUAAGUCCUCUUCAGUCCCA	|||x|o|||||||||o||||~	UAAAUUAGGAGAAGUUAGGGG	2	2.5	0.802885	No
	GRMZM2G006297_T03	AUUAAGUCCUCUUCAGUCCCA	|||x|o|||||||||o||||~	UAAAUUAGGAGAAGUUAGGGG	2	2.5	0.802885	No
	GRMZM2G125762_T03	AUUUAAUCCUCUCCAAUCCUA	||||||||||||x||||||o~	UAAAUUAGGAGAAGUUAGGGG	1.5	3	0.812834	No
	GRMZM2G134753_T01	AUUUAAUCCUCCUCAAUCUCC	|||||||||||x||||||o|~	UAAAUUAGGAGAAGUUAGGGG	1.5	3	0.807792	No
	GRMZM2G134753_T02	AUUUAAUCCUCCUCAAUCUCC	|||||||||||x||||||o|~	UAAAUUAGGAGAAGUUAGGGG	1.5	3	0.807792	No
	GRMZM2G049076_T01	AUGUAAUCCUCUCCAAUCCCC	||x|||||||||x|||||||~	UAAAUUAGGAGAAGUUAGGGG	2	3	0.740139	sucrose-phosphate synthase activity
	GRMZM2G068255_T01	AUUUAAUUCUCUCUAAUCCCU	|||||||o||||xo||||||~	UAAAUUAGGAGAAGUUAGGGG	2	3.5	0.8	nucleic acid binding
	GRMZM2G068255_T02	AUUUAAUUCUCUCUAAUCCCU	|||||||o||||xo||||||~	UAAAUUAGGAGAAGUUAGGGG	2	3.5	0.8	No
zma-miRn5	GRMZM2G115998_T01	CGUCCGCGUUUCCACCCCAAG	~|x||o|||x||||||||||o	ACUGGUGCAUAGGUGGGGUUU	3	4	0.762105	No
	GRMZM2G056431_T03	UGCACAUGUAUCCACCUCAAU	||xx||o|||||||||o|||~	ACUGGUGCAUAGGUGGGGUUU	3	3.5	0.78125	No
zma-miRn6	GRMZM2G123644_T01	GUUGGGAUGGAGCCUGGUCCGG	~~x||o|||o|||||||||||o	GCCCCUUACUUCGGACCAGGCU	2.5	3	0.773585	DNA binding
	GRMZM2G336718_T01	GUUGGGAUGGAGCCUGGUCCGG	~~x||o|||o|||||||||||o	GCCCCUUACUUCGGACCAGGCU	2.5	3	0.773585	DNA binding
	GRMZM2G499154_T01	CUGGGGAACAAGCCUGGUCCGA	~~|||o|xx|||||||||||||	GCCCCUUACUUCGGACCAGGCU	2.5	2.5	0.796512	nucleic acid binding
	GRMZM2G008359_T01	AGAGGUAUGAAGUCUGGUCCAA	x|x||x||||||o|||||||~~	GCCCCUUACUUCGGACCAGGCU	3.5	4	0.749446	protein serine/threonine kinase activity
	GRMZM5G845891_T01	AAGGGAUUGAAGCCUGGUCCGA	~~||||x|||||||||||||||	GCCCCUUACUUCGGACCAGGCU	1	1	0.886364	No
	GRMZM5G845891_T01	CGAGGAAUGAAGCCUGGUCCGA	||x|||||||||||||||||~~	GCCCCUUACUUCGGACCAGGCU	1	1	0.9	No
	AC206425.3_FGT004	AGAGGUAUGAAGUCUGGUCCAA	x|x||x||||||o|||||||~~	GCCCCUUACUUCGGACCAGGCU	3.5	4	0.749446	protein serine/threonine kinase activity
	GRMZM2G135175_T01	CGGUGAAGGAAGCCUGGUCCGU	|||x|||x||||||||||||~~	GCCCCUUACUUCGGACCAGGCU	2	2	0.753937	drug transmembrane transporter activity
	GRMZM2G111472_T01	UGGGAAUUUAAGCCUGGUCCUG	o|||x|x|x|||||||||||~~	GCCCCUUACUUCGGACCAGGCU	3.5	3.5	0.762637	No
	GRMZM2G042250_T01	CCUGGGAUGAAGCCUGGUCCGG	~~x||o|||||||||||||||o	GCCCCUUACUUCGGACCAGGCU	2	2	0.784499	rolled leaf 2
	GRMZM2G042250_T02	CCUGGGAUGAAGCCUGGUCCGG	~~x||o|||||||||||||||o	GCCCCUUACUUCGGACCAGGCU	2	2	0.784499	rolled leaf 2
	GRMZM2G042250_T03	CCUGGGAUGAAGCCUGGUCCGG	~~x||o|||||||||||||||o	GCCCCUUACUUCGGACCAGGCU	2	2	0.784499	transcription factor activity
	GRMZM2G042250_T04	CCUGGGAUGAAGCCUGGUCCGG	~~x||o|||||||||||||||o	GCCCCUUACUUCGGACCAGGCU	2	2	0.784499	transcription factor activity
	GRMZM2G178102_T01	GUUGGGAUGAAGCCUGGUCCGG	~~x||o|||||||||||||||o	GCCCCUUACUUCGGACCAGGCU	2	2	0.820158	transcription factor activity
	GRMZM2G003509_T01	GUUGGGAUGAAGCCUGGUCCGG	~~x||o|||||||||||||||o	GCCCCUUACUUCGGACCAGGCU	2	2	0.820158	transcription factor activity
	GRMZM2G003509_T02	GUUGGGAUGAAGCCUGGUCCGG	~~x||o|||||||||||||||o	GCCCCUUACUUCGGACCAGGCU	2	2	0.820158	transcription factor activity
	AC187157.4_FGT005	CCCGGGAUGAAGCCUGGUCCGG	~~x||o|||||||||||||||o	GCCCCUUACUUCGGACCAGGCU	2	2	0.768382	transcription factor activity
	GRMZM2G109987_T01	CCUGGGAUGAAGCCUGGUCCGG	~~x||o|||||||||||||||o	GCCCCUUACUUCGGACCAGGCU	2	2	0.784499	transcription factor activity
	GRMZM2G109987_T02	CCUGGGAUGAAGCCUGGUCCGG	~~x||o|||||||||||||||o	GCCCCUUACUUCGGACCAGGCU	2	2	0.784499	transcription factor activity
	GRMZM2G109987_T03	CCUGGGAUGAAGCCUGGUCCGG	~~x||o|||||||||||||||o	GCCCCUUACUUCGGACCAGGCU	2	2	0.784499	transcription factor activity
	GRMZM2G109987_T04	CCUGGGAUGAAGCCUGGUCCGG	~~x||o|||||||||||||||o	GCCCCUUACUUCGGACCAGGCU	2	2	0.784499	transcription factor activity
	GRMZM2G109987_T05	CCUGGGAUGAAGCCUGGUCCGG	~~x||o|||||||||||||||o	GCCCCUUACUUCGGACCAGGCU	2	2	0.784499	transcription factor activity
	GRMZM2G469551_T01	CCUGGGAUGAAGCCUGGUCCGG	~~x||o|||||||||||||||o	GCCCCUUACUUCGGACCAGGCU	2	2	0.784499	transcription factor activity
	GRMZM2G469551_T02	CCUGGGAUGAAGCCUGGUCCGG	~~x||o|||||||||||||||o	GCCCCUUACUUCGGACCAGGCU	2	2	0.784499	transcription factor activity
zma-miRn7	GRMZM2G372102_T01	UUUGUUUGAAUUGUUCUGCAU	~x|x|x|o|||||||||||||	GCAGACAUUUAACAAGACGUA	3.5	3.5	0.784024	36.4 kDa proline-rich protein
	GRMZM2G044044_T01	UGGCUGUAAAUUGUUCUGUGU	~|x|||||||||||||||oo|	GCAGACAUUUAACAAGACGUA	2	3	0.73057	No
	GRMZM2G139022_T02	CUUUUGUGAUUUGUUCUGCAA	|x|o|||o|x||||||||||~	GCAGACAUUUAACAAGACGUA	3	4	0.775862	No
	GRMZM2G139022_T03	CUUUUGUGAUUUGUUCUGCAA	|x|o|||o|x||||||||||~	GCAGACAUUUAACAAGACGUA	3	4	0.775862	No
	GRMZM2G139022_T04	CUUUUGUGAUUUGUUCUGCAA	|x|o|||o|x||||||||||~	GCAGACAUUUAACAAGACGUA	3	4	0.775862	No
zma-miRn8a/b	GRMZM2G008123_T01	GUUCCUUCUGUUCUUAGGUCU	~o|||o||o||||o||o||||	UGAGGGAGGCAAGGAUUCAGA	2.5	4	0.858561	acid-amino acid ligase activity
	GRMZM2G008123_T02	GUUCCUUCUGUUCUUAGGUCU	~o|||o||o||||o||o||||	UGAGGGAGGCAAGGAUUCAGA	2.5	4	0.858561	No
	GRMZM2G008123_T03	GUUCCUUCUGUUCUUAGGUCU	~o|||o||o||||o||o||||	UGAGGGAGGCAAGGAUUCAGA	2.5	4	0.858561	No
	GRMZM2G008123_T04	GUUCCUUCUGUUCUUAGGUCU	~o|||o||o||||o||o||||	UGAGGGAGGCAAGGAUUCAGA	2.5	4	0.858561	No
	GRMZM2G330424_T01	GUUUUAUCCGUUCCUAGGUCC	oo|oox||||||||||o|||~	UGAGGGAGGCAAGGAUUCAGA	3.5	4	0.748166	No
zma-miRn9	GRMZM2G058655_T03	UAUUAGCUCUAGUGCAUUUAAA	~|||||x|||||||||||o||~	UUAAUCAAGAUCACGUAAGUUU	1.5	2	0.791667	No
	GRMZM2G058655_T05	UAUUAGCUCUAGUGCAUUUAAA	~|||||x|||||||||||o||~	UUAAUCAAGAUCACGUAAGUUU	1.5	2	0.791667	No
	GRMZM2G409726_T01	AAUUAGUUUCAGUGCAUUCAAA	||||||||ox||||||||||~~	UUAAUCAAGAUCACGUAAGUUU	1.5	2.5	0.834758	polyubiquitin
	GRMZM2G045987_T01	UAUUAGCUCUAGUGCAUUCAAA	~|||||x||||||||||||||~	UUAAUCAAGAUCACGUAAGUUU	1	1	0.801567	COPII vesicle coat
	GRMZM5G836028_T01	UAUUAGUUCUAGUGCAUUCAAA	~||||||||||||||||||||~	UUAAUCAAGAUCACGUAAGUUU	0	0	0.972145	No
	GRMZM2G427486_T01	UUUUAGCUCUAGUGUAUUCAUA	~~||||x|||||||o|||||x|	UUAAUCAAGAUCACGUAAGUUU	2.5	4	0.743802	No
	GRMZM5G816110_T01	AAUUAGUUCUAGUGCAUUCAAA	||||||||||||||||||||~~	UUAAUCAAGAUCACGUAAGUUU	0	0	1	cytoskeleton
	GRMZM2G455978_T01	UAUUAGCUCUAGUGCAUUCAUG	x|||||x|||||||||||||~~	UUAAUCAAGAUCACGUAAGUUU	2	2	0.747475	actin cytoskeleton
	GRMZM2G166931_T01	AUUUGGUUUAAGUGCAUUCAUU	|x||o|||ox||||||||||~~	UUAAUCAAGAUCACGUAAGUUU	3	4	0.765043	riboflavin kinase family protein
	GRMZM2G089876_T01	UAUUAGCUCUAGUGCAUUCAAA	~|||||x||||||||||||||~	UUAAUCAAGAUCACGUAAGUUU	1	1	0.801567	No
	GRMZM2G066981_T01	UAUUAGUUUUAGUGCAUUCAAA	~|||||||o||||||||||||~	UUAAUCAAGAUCACGUAAGUUU	0.5	0.5	0.972892	Cofactor required for Sp1 transcriptional activation subunit 9
	GRMZM2G066981_T02	UAUUAGUUUUAGUGCAUUCAAA	~|||||||o||||||||||||~	UUAAUCAAGAUCACGUAAGUUU	0.5	0.5	0.972892	Cofactor required for Sp1 transcriptional activation subunit 9
	GRMZM2G066981_T06	UAUUAGUUUUAGUGCAUUCAAA	~|||||||o||||||||||||~	UUAAUCAAGAUCACGUAAGUUU	0.5	0.5	0.972892	Cofactor required for Sp1 transcriptional activation subunit 9
	GRMZM2G420713_T01	UAUCAUAUCUAGUGCAUUCAAA	~||x|xx||||||||||||||~	UUAAUCAAGAUCACGUAAGUUU	3	3	0.745205	nucleic acid binding
	GRMZM2G439860_T02	AAUUAGUUUUAGUGCAUUCAAA	||||||||o|||||||||||~~	UUAAUCAAGAUCACGUAAGUUU	0.5	0.5	1.00305	No
	GRMZM2G027546_T01	UAUUGGUUCUAGUGCAUUCAAA	~|||o||||||||||||||||~	UUAAUCAAGAUCACGUAAGUUU	0.5	0.5	0.912929	post-translational protein modification
	GRMZM2G027546_T02	UAUUGGUUCUAGUGCAUUCAAA	~|||o||||||||||||||||~	UUAAUCAAGAUCACGUAAGUUU	0.5	0.5	0.912929	post-translational protein modification
	GRMZM2G147256_T01	UAUUAACUCUAGUGCAUUUAAA	~||||xx|||||||||||o||~	UUAAUCAAGAUCACGUAAGUUU	2.5	3	0.738095	lyase activity
	GRMZM2G313737_T01	UAUUAGUUUUAGUGGAUUCAAA	~|||||||o|||||x||||||~	UUAAUCAAGAUCACGUAAGUUU	1.5	2.5	0.832335	regulation of transcription, DNA-dependent
	GRMZM2G091397_T02	UAUUAGUUCUAGUGCAUUUAAA	~|||||||||||||||||o||~	UUAAUCAAGAUCACGUAAGUUU	0.5	1	0.973214	regulation of transcription, DNA-dependent
	GRMZM2G152408_T01	UAUUAGUUCUAGUAUAUUCAAA	~||||||||||||xo||||||~	UUAAUCAAGAUCACGUAAGUUU	1.5	3	0.83125	protein binding
	GRMZM2G152408_T02	UAUUAGUUCUAGUAUAUUCAAA	~||||||||||||xo||||||~	UUAAUCAAGAUCACGUAAGUUU	1.5	3	0.83125	protein binding
	GRMZM2G157310_T01	UUUUAGCACUAGUGCAUUCAAA	~~||||xx||||||||||||||	UUAAUCAAGAUCACGUAAGUUU	2	2	0.736702	No
	GRMZM2G157310_T02	UUUUAGCACUAGUGCAUUCAAA	~~||||xx||||||||||||||	UUAAUCAAGAUCACGUAAGUUU	2	2	0.736702	No
	GRMZM2G086583_T01	UAAUAGUUUUAGUGCAUUUAAA	~|x|||||o|||||||||o||~	UUAAUCAAGAUCACGUAAGUUU	2	2.5	0.935275	post-translational protein modification
	GRMZM2G002859_T01	UAUUAGUUUUAGUGCAUUCAAA	~|||||||o||||||||||||~	UUAAUCAAGAUCACGUAAGUUU	0.5	0.5	0.972892	protein binding
	GRMZM2G359365_T02	AAUUAGUUCUAAUGCGUUUAGU	|||||||||||x|||o||o|~~	UUAAUCAAGAUCACGUAAGUUU	2	4	0.760807	No
	GRMZM2G023438_T01	UAUUAGUUUUAGUGUAUUCAAA	~|||||||o|||||o||||||~	UUAAUCAAGAUCACGUAAGUUU	1	1.5	0.971154	importin alpha-1b subunit
	GRMZM2G023438_T02	UAUUAGUUUUAGUGUAUUCAAA	~|||||||o|||||o||||||~	UUAAUCAAGAUCACGUAAGUUU	1	1.5	0.971154	importin alpha-1b subunit
	GRMZM2G023438_T03	UAUUAGUUUUAGUGUAUUCAAA	~|||||||o|||||o||||||~	UUAAUCAAGAUCACGUAAGUUU	1	1.5	0.971154	importin alpha-1b subunit
	GRMZM2G016997_T01	UAUUAGUUCUAGUGCAUUCAAA	~||||||||||||||||||||~	UUAAUCAAGAUCACGUAAGUUU	0	0	0.972145	No
zma-miRn10	GRMZM2G438755_T01	CCAGCUUUUGCAAGGUCUCACU	~||||||o||||x||||||||~	CGUCGAAGACGUCCCAGAGUGA	1.5	2.5	0.853659	No
	GRMZM2G181002_T01	GCAGUUUCUGCAUGGUCUCGGU	||||o|||||||x||||||o~~	CGUCGAAGACGUCCCAGAGUGA	2	3.5	0.792373	protein serine/threonine kinase activity
	GRMZM2G181002_T02	GCAGUUUCUGCAUGGUCUCGGU	||||o|||||||x||||||o~~	CGUCGAAGACGUCCCAGAGUGA	2	3.5	0.792373	protein serine/threonine kinase activity
	GRMZM2G015073_T01	GCAGUUUCUGCAUGGUCUCGGU	||||o|||||||x||||||o~~	CGUCGAAGACGUCCCAGAGUGA	2	3.5	0.792373	protein serine/threonine kinase activity
	GRMZM2G167212_T01	GCAGCUUCUGCAGGGCGUCAUC	|||||||||||||||xx|||~~	CGUCGAAGACGUCCCAGAGUGA	2	4	0.769685	No
	GRMZM2G167212_T02	GCAGCUUCUGCAGGGCGUCAUC	|||||||||||||||xx|||~~	CGUCGAAGACGUCCCAGAGUGA	2	4	0.769685	No
	GRMZM2G104258_T01	UCAGCUUGUGCAGGGUUUUAAA	x||||||x||||||||o|o|~~	CGUCGAAGACGUCCCAGAGUGA	3	4	0.844125	No
	GRMZM2G104258_T02	UCAGCUUGUGCAGGGUUUUAAA	x||||||x||||||||o|o|~~	CGUCGAAGACGUCCCAGAGUGA	3	4	0.844125	No
	GRMZM2G028286_T01	CUAGCUUCUGCAGGGUACCACU	~~||||||||||||||xx||||	CGUCGAAGACGUCCCAGAGUGA	2	4	0.781705	No
	GRMZM2G028286_T02	CUAGCUUCUGCAGGGUACCACU	~~||||||||||||||xx||||	CGUCGAAGACGUCCCAGAGUGA	2	4	0.781705	No
	GRMZM2G028286_T04	CUAGCUUCUGCAGGGUACCACU	~~||||||||||||||xx||||	CGUCGAAGACGUCCCAGAGUGA	2	4	0.781705	No
	GRMZM2G180406_T01	GAAGCUUCUGCAGGAUCUCGUC	|x||||||||||||x||||o~~	CGUCGAAGACGUCCCAGAGUGA	2.5	4	0.749465	transcription regulator activity
	GRMZM2G180406_T03	GAAGCUUCUGCAGGAUCUCGUC	|x||||||||||||x||||o~~	CGUCGAAGACGUCCCAGAGUGA	2.5	4	0.749465	transcription regulator activity
zma-miRn11a-c	GRMZM2G010016_T01	UUAGAUCCAUAAACUUUGAAA	||||x||||ox|||||||||~	AAUCCAGGUGCUUGAAACUUU	2.5	4	0.746914	No
zma-miRn12	GRMZM2G405178_T02	UAAUUGAGAUCUCCUCUAGAA	~||o|x|o|||o||||o||||	UUUGAGUUUAGGGGAGGUCUU	3	4	0.765172	thiopurine S-methyltransferase activity
	GRMZM2G405178_T03	UAAUUGAGAUCUCCUCUAGAA	~||o|x|o|||o||||o||||	UUUGAGUUUAGGGGAGGUCUU	3	4	0.765172	No
	GRMZM2G044372_T01	GAAUUCAAGUGCCCUCCAGAA	~||o||||o|x||||||||||	UUUGAGUUUAGGGGAGGUCUU	2	3.5	0.814118	metal ion transport
	GRMZM5G855375_T01	CAGCUCAAAUCCCCAUCAGAA	~|o|||||||||||xo|||||	UUUGAGUUUAGGGGAGGUCUU	2	3.5	0.78169	No
	GRMZM2G351747_T01	AAUUUCAAAUCCCCUCCCGAA	||xo|||||||||||||x||~	UUUGAGUUUAGGGGAGGUCUU	2.5	3.5	0.787129	No
	GRMZM2G351747_T02	AAUUUCAAAUCCCCUCCCGAA	||xo|||||||||||||x||~	UUUGAGUUUAGGGGAGGUCUU	2.5	3.5	0.787129	No
	GRMZM2G351747_T03	AAUUUCAAAUCCCCUCCCGAA	||xo|||||||||||||x||~	UUUGAGUUUAGGGGAGGUCUU	2.5	3.5	0.787129	No
	GRMZM2G110000_T04	AAACUUAAAUCCCCUCCGGGA	|||||o|||||||||||o|o~	UUUGAGUUUAGGGGAGGUCUU	1.5	2.5	0.882904	No
	GRMZM2G039622_T01	AAACUCAAAUCCCCUUCGGGA	|||||||||||||||o|o|o~	UUUGAGUUUAGGGGAGGUCUU	1.5	3	0.868545	No
	GRMZM2G103900_T05	GAACUCAAAUUCCCUCUAGAA	~|||||||||o|||||o||||	UUUGAGUUUAGGGGAGGUCUU	1	2	0.950392	No
	GRMZM2G160454_T01	CAGCUCAAAGCCCUUCCAGAA	~|o||||||x|||o|||||||	UUUGAGUUUAGGGGAGGUCUU	2	3.5	0.752252	Brix domain-containing protein 2
	GRMZM2G329325_T01	CUACUCGAAUCCCCUCCAAAA	~x||||o|||||||||||x||	UUUGAGUUUAGGGGAGGUCUU	2.5	3.5	0.830549	serine-type endopeptidase activity
	GRMZM2G111491_T01	UAUUUUAAAUCCUCUCCAGAG	~|xo|o||||||o|||||||o	UUUGAGUUUAGGGGAGGUCUU	3	3.5	0.869444	protein serine/threonine kinase activity
	GRMZM2G028089_T01	AGACUCAAAUCCCCUUCGGGA	|o|||||||||||||o|o|o~	UUUGAGUUUAGGGGAGGUCUU	2	3.5	0.818985	COP9 signalosome complex subunit 6a
	GRMZM2G028089_T01	AAACUCUAAUCCCCUCCGGGA	||||||x||||||||||o|o~	UUUGAGUUUAGGGGAGGUCUU	2	3	0.788546	COP9 signalosome complex subunit 6a
	GRMZM2G155954_T01	AAACUCAAAUCUACUCUAGAA	|||||||||||ox|||o|||~	UUUGAGUUUAGGGGAGGUCUU	2	4	0.859599	response to freezing
	GRMZM2G155954_T02	AAACUCAAAUCUACUCUAGAA	|||||||||||ox|||o|||~	UUUGAGUUUAGGGGAGGUCUU	2	4	0.859599	response to freezing
	GRMZM2G155954_T03	AAACUCAAAUCUACUCUAGAA	|||||||||||ox|||o|||~	UUUGAGUUUAGGGGAGGUCUU	2	4	0.859599	response to freezing
	GRMZM2G155954_T04	AAACUCAAAUCUACUCUAGAA	|||||||||||ox|||o|||~	UUUGAGUUUAGGGGAGGUCUU	2	4	0.859599	response to freezing
	GRMZM2G155954_T05	AAACUCAAAUCUACUCUAGAA	|||||||||||ox|||o|||~	UUUGAGUUUAGGGGAGGUCUU	2	4	0.859599	response to freezing
	GRMZM2G447535_T01	AUACUCAAGUCCCCUCCGGGA	|x||||||o||||||||o|o~	UUUGAGUUUAGGGGAGGUCUU	2.5	4	0.80167	No
	GRMZM2G011269_T01	AAGCUCGAAUUCUCUUCAGAA	||o|||o|||o|o||o||||~	UUUGAGUUUAGGGGAGGUCUU	2.5	4	0.833766	Mpv17 / PMP22 family protein
	GRMZM2G023418_T01	GAACUCAGAUCCUCUCUAGGA	~||||||o||||o|||o||o|	UUUGAGUUUAGGGGAGGUCUU	2	3.5	0.821101	GTPase activity
zma-miRn13a/b	GRMZM2G380195_T05	UUUUUUAUAAACUCGGUCAAA	||||o||o|||||x||||||~	AAAAGAUGUUUGAACCAGUUU	2	3	0.813505	No
	GRMZM2G380195_T07	UUUUUUAUAAACUCGGUCAAA	||||o||o|||||x||||||~	AAAAGAUGUUUGAACCAGUUU	2	3	0.813505	No
	GRMZM2G108694_T01	UUUUCUAAAAACUUGGUUAGA	|||||||x|||||||||o|o~	AAAAGAUGUUUGAACCAGUUU	2	3	0.810726	two-component signal transduction system (phosphorelay)
	GRMZM5G887594_T01	UCUUUUAUAAACUUAGUCAAA	|x||o||o||||||x|||||~	AAAAGAUGUUUGAACCAGUUU	3	4	0.732441	No
	GRMZM2G080156_T04	UUUUCUAUAAACUUGAUCAAA	|||||||o|||||||x||||~	AAAAGAUGUUUGAACCAGUUU	1.5	2.5	0.846667	No
	GRMZM2G152661_T01	UUUUUUACAAACAUGGUCAAA	||||o|||||||x|||||||~	AAAAGAUGUUUGAACCAGUUU	1.5	2.5	0.866242	transcription regulator activity
	GRMZM2G108277_T02	AUUUCUUAAAAUUUGGUCAAA	~|||||xx|||o|||||||||	AAAAGAUGUUUGAACCAGUUU	2.5	3	0.825342	spliceosomal complex
	GRMZM2G031028_T02	CUUUUUAUGAAUUUGGUCAAA	~|||o||oo||o|||||||||	AAAAGAUGUUUGAACCAGUUU	2	3	0.858553	plastid-lipid-associated protein 2
	GRMZM2G444029_T03	UUUUGUAUAAACUUGGUCAAA	||||x||o||||||||||||~	AAAAGAUGUUUGAACCAGUUU	1.5	1.5	0.877358	No
	GRMZM2G078154_T02	AUUGAUAUAAACUUGGUUAAA	~||xx||o|||||||||o|||	AAAAGAUGUUUGAACCAGUUU	3	3.5	0.786667	transporter activity
	GRMZM2G010991_T02	CGUUUUAUAGAUUUGGUCAAA	~x||o||o|o|o|||||||||	AAAAGAUGUUUGAACCAGUUU	3	4	0.811728	structural constituent of ribosome
	GRMZM2G142964_T01	UUUUCUAGUAACUUGGUUAAA	|||||||xx||||||||o||~	AAAAGAUGUUUGAACCAGUUU	2.5	4	0.83125	No
	GRMZM2G162668_T01	UUUUCUAUAAACUUGGUCGAA	|||||||o||||||||||o|~	AAAAGAUGUUUGAACCAGUUU	1	1.5	0.93787	No
zma-miRn14	GRMZM2G382106_T03	AUCGAAUUAUUUGAUCCGUUA	|x|o||oo|||||||||o||~	UCGUUUGGUAAACUAGGUAAU	3	3.5	0.78209	No
	GRMZM2G177052_T01	AGCAAACCAUCUGAUCCAUUA	||||||||||x|||||||||~	UCGUUUGGUAAACUAGGUAAU	1	2	0.842239	No
	GRMZM2G409265_T01	UGCAAACCAUUUAAUCCAUUG	~|||||||||||x|||||||o	UCGUUUGGUAAACUAGGUAAU	1.5	2.5	0.831909	steroid metabolic process
	GRMZM2G409265_T02	UGCAAACCAUUUAAUCCAUUG	~|||||||||||x|||||||o	UCGUUUGGUAAACUAGGUAAU	1.5	2.5	0.831909	steroid metabolic process
	GRMZM2G047681_T01	GGUAAAUUAUUUGAUCCUUUG	o|o|||oo|||||||||x||~	UCGUUUGGUAAACUAGGUAAU	3	4	0.800623	No
	GRMZM2G123089_T04	AGCAAACUAUCUGAUCCAUUA	|||||||o||x|||||||||~	UCGUUUGGUAAACUAGGUAAU	1.5	2.5	0.825737	No
zma-miRn15a-d	GRMZM2G072614_T01	UUUGCCUCUCCAGUCUCCUCC	||x|||o|||||o||o||||~	AAUCGGGGAGGUUAGGGGAGA	2.5	3.5	0.805907	No
	GRMZM2G034551_T01	UUAGCCCCUCCAAUCCCCUCC	||||||||||||||||||||~	AAUCGGGGAGGUUAGGGGAGA	0	0	0.953722	metal ion transport
	GRMZM2G057186_T01	GAAGCCCGUCCGAUCUCCUCU	~x|||||x|||o|||o|||||	AAUCGGGGAGGUUAGGGGAGA	3	4	0.816116	VTC2
	GRMZM2G057186_T03	GAAGCCCGUCCGAUCUCCUCU	~x|||||x|||o|||o|||||	AAUCGGGGAGGUUAGGGGAGA	3	4	0.816116	catalytic activity
	GRMZM2G159393_T01	UUAGUCAGUCCAAUCCCCUUG	||||o|xx|||||||||||o~	AAUCGGGGAGGUUAGGGGAGA	3	3.5	0.809859	oxidoreductase activity
	GRMZM5G830319_T01	UUUGCCUCUCCAGUCUCCUCC	||x|||o|||||o||o||||~	AAUCGGGGAGGUUAGGGGAGA	2.5	3.5	0.805907	No
	GRMZM2G146679_T01	UUGGUCCCUCCAGUCUCUUCU	||o|o|||||||o||o|o||~	AAUCGGGGAGGUUAGGGGAGA	2.5	4	0.861472	No
	GRMZM2G019180_T01	UUAACCCUUUCAAUCCUCUCA	|||x|||o|o||||||o|||~	AAUCGGGGAGGUUAGGGGAGA	2.5	3.5	0.844388	No
	GRMZM2G099850_T01	UUAGCCGCUCUAAUACCCUCU	||||||x|||o|||x|||||~	AAUCGGGGAGGUUAGGGGAGA	2.5	4	0.786207	protein binding
	AC190841.2_FGT007	UUAGUCCCUCUAAUCUCCUUC	||||o|||||o||||o|||o~	AAUCGGGGAGGUUAGGGGAGA	2	3.5	0.917275	No
	GRMZM2G050027_T01	UUAGCCUCUCUGAUCCCCUCA	||||||o|||oo||||||||~	AAUCGGGGAGGUUAGGGGAGA	1.5	2.5	0.901499	No
	GRMZM2G316474_T01	UCGGCCUCUCCAAGCCCCUCG	|xo|||o||||||x||||||~	AAUCGGGGAGGUUAGGGGAGA	3	4	0.751908	protein serine/threonine kinase activity
	GRMZM2G484653_T01	UUUGUUUCUCCAAUCCCUUCC	||x|ooo||||||||||o||~	AAUCGGGGAGGUUAGGGGAGA	3	3.5	0.83	No
	GRMZM5G894109_T01	UCAUCCCCUCCAAUCCCCUUU	|x|x|||||||||||||||o~	AAUCGGGGAGGUUAGGGGAGA	2.5	3	0.83913	No
	GRMZM2G005229_T03	UUAGUCCCUUCAGUCCCCUUA	||||o||||o||o||||||o~	AAUCGGGGAGGUUAGGGGAGA	2	3.5	0.925	No
	GRMZM2G504623_T01	UAGCUCCCUCCAAUCCCCUUC	|xoxo||||||||||||||o~	AAUCGGGGAGGUUAGGGGAGA	3.5	4	0.877895	No
	GRMZM2G098331_T01	UUAGUUCCUUCAAUCCCCUCC	||||oo|||o||||||||||~	AAUCGGGGAGGUUAGGGGAGA	1.5	2	0.911215	transporter activity
	GRMZM2G098331_T02	UUAGUUCCUUCAAUCCCCUCC	||||oo|||o||||||||||~	AAUCGGGGAGGUUAGGGGAGA	1.5	2	0.911215	No
	GRMZM2G093902_T01	UUAGGCCCUUCAAUCUCCUCU	||||x||||o|||||o||||~	AAUCGGGGAGGUUAGGGGAGA	2	3	0.854545	No
	GRMZM2G093902_T02	UUAGGCCCUUCAAUCUCCUCU	||||x||||o|||||o||||~	AAUCGGGGAGGUUAGGGGAGA	2	3	0.854545	No
	GRMZM2G078396_T01	UUAGCUCCUCCAAUCCCCUUG	|||||o|||||||||||||o~	AAUCGGGGAGGUUAGGGGAGA	1	1.5	0.964365	60S ribosomal protein L23
	GRMZM2G078396_T02	UUAGCUCCUCCAAUCCCCUUG	|||||o|||||||||||||o~	AAUCGGGGAGGUUAGGGGAGA	1	1.5	0.964365	structural constituent of ribosome
	GRMZM2G045544_T01	CUAGCCCCCUCAAUCCCCUCU	~|||||||xo|||||||||||	AAUCGGGGAGGUUAGGGGAGA	1.5	3	0.826613	protein binding
	GRMZM2G380668_T01	UUAGCCCCUCCAAUCCCCUCU	||||||||||||||||||||~	AAUCGGGGAGGUUAGGGGAGA	0	0	1	dicarboxylic acid transport
	GRMZM2G052750_T01	UUAGCCUCUCGGAUCCCCUCA	||||||o|||xo||||||||~	AAUCGGGGAGGUUAGGGGAGA	2	3.5	0.856846	No
	GRMZM2G033379_T02	UUAUCCCCUCCAAUCCCCUCC	|||x||||||||||||||||~	AAUCGGGGAGGUUAGGGGAGA	1	1	0.855346	heat shock protein binding
	GRMZM2G135651_T01	UUAGCCCCUCCAAUUCUCUCC	||||||||||||||o|o|||~	AAUCGGGGAGGUUAGGGGAGA	1	2	0.918142	ion transport
	GRMZM2G004784_T01	CUAGCCCCUCCAACCCCCUCC	x||||||||||||x||||||~	AAUCGGGGAGGUUAGGGGAGA	2	3	0.808712	No
	GRMZM2G163157_T01	AUGGAUUCUCCAAUCCCCUCA	x|o|xoo|||||||||||||~	AAUCGGGGAGGUUAGGGGAGA	3.5	3.5	0.809524	6b-interacting protein 1
	GRMZM2G181359_T01	GAAGCACCUCCAAUCCCCUCG	xx|||x||||||||||||||~	AAUCGGGGAGGUUAGGGGAGA	3	3	0.842105	nucleoside-triphosphatase activity
	GRMZM2G077233_T03	UUAGCUCUUUCAAUCUUCUCC	|||||o|o|o|||||oo|||~	AAUCGGGGAGGUUAGGGGAGA	2.5	4	0.861619	proteolysis
	GRMZM2G077233_T04	UUAGCUCUUUCAAUCUUCUCC	|||||o|o|o|||||oo|||~	AAUCGGGGAGGUUAGGGGAGA	2.5	4	0.861619	proteolysis
	GRMZM2G028089_T01	UUAGAAACUCUAAUCCCCUCC	||||xxx|||o|||||||||~	AAUCGGGGAGGUUAGGGGAGA	3.5	4	0.784314	COP9 signalosome complex subunit 6a
	GRMZM2G055116_T01	UUAGCCCCUUCAAUUCUCUCC	|||||||||o||||o|o|||~	AAUCGGGGAGGUUAGGGGAGA	1.5	3	0.901869	No
	GRMZM2G381453_T06	UUAGCCCUUUCAAUCCCCUCU	|||||||o|o||||||||||~	AAUCGGGGAGGUUAGGGGAGA	1	1.5	0.981693	transporter activity
	GRMZM2G322493_T01	CGAGCCCCUCCGAUCCCUUCG	xx|||||||||o|||||o||~	AAUCGGGGAGGUUAGGGGAGA	3	4	0.869822	hydrolase activity
	GRMZM2G125762_T03	UAAUUCCUUCCAAUUCCCUCA	|x|xo||o||||||o|||||~	AAUCGGGGAGGUUAGGGGAGA	3.5	4	0.862245	No
	GRMZM5G814314_T02	UAAUCUCCUCCAAUCCCCUUC	|x|x|o|||||||||||||o~	AAUCGGGGAGGUUAGGGGAGA	3	3.5	0.821346	post-translational protein modification
	GRMZM2G049076_T01	UAAUCCUCUCCAAUCCCCUUU	|x|x||o||||||||||||o~	AAUCGGGGAGGUUAGGGGAGA	3	3.5	0.855769	sucrose metabolic process
	GRMZM2G081541_T01	CUAUUCUCUCCAAUCCUCUCC	x||xo|o|||||||||o|||~	AAUCGGGGAGGUUAGGGGAGA	3.5	4	0.770142	nucleoside-triphosphatase activity
	GRMZM2G109464_T01	CUAGCCCCUUCAAUCCUCUCC	x||||||||o||||||o|||~	AAUCGGGGAGGUUAGGGGAGA	2	3	0.894168	Zinc finger protein
	GRMZM2G109464_T02	CUAGCCCCUUCAAUCCUCUCC	x||||||||o||||||o|||~	AAUCGGGGAGGUUAGGGGAGA	2	3	0.894168	zinc ion binding
	GRMZM2G151223_T01	UUAGCCCGUCCAAUCCCCUUC	|||||||x|||||||||||o~	AAUCGGGGAGGUUAGGGGAGA	1.5	2	0.888172	two-component signal transduction system (phosphorelay)
	GRMZM2G012434_T03	UAAUCCCCUCCAAUCCACUCC	|x|x||||||||||||x|||~	AAUCGGGGAGGUUAGGGGAGA	3	4	0.730684	No
zma-miRn17	GRMZM2G448927_T01	AUUUUUUUCAAUCCCCUUCCA	||oo|o|o|||||||||||x~	UAGGAGAGGUUAGGGGAAGUU	3	4	0.853186	No
	GRMZM2G448927_T02	AUUUUUUUCAAUCCCCUUCCA	||oo|o|o|||||||||||x~	UAGGAGAGGUUAGGGGAAGUU	3	4	0.853186	No
	GRMZM2G448927_T03	AUUUUUUUCAAUCCCCUUCCA	||oo|o|o|||||||||||x~	UAGGAGAGGUUAGGGGAAGUU	3	4	0.853186	No
	GRMZM2G448927_T05	AUUUUUUUCAAUCCCCUUCCA	||oo|o|o|||||||||||x~	UAGGAGAGGUUAGGGGAAGUU	3	4	0.853186	No
	GRMZM2G448927_T06	AUUUUUUUCAAUCCCCUUCCA	||oo|o|o|||||||||||x~	UAGGAGAGGUUAGGGGAAGUU	3	4	0.853186	No
	GRMZM2G383240_T07	AUCCUCUCCAAUCCCCCUCAA	||||||||||||||||x|||~	UAGGAGAGGUUAGGGGAAGUU	1	2	0.859914	protein serine/threonine kinase activity
	GRMZM2G088290_T01	AUUCAAUUCAAUCCCUUUCAG	||o|xx|o|||||||o||||~	UAGGAGAGGUUAGGGGAAGUU	3.5	4	0.788136	No
	GRMZM5G894109_T01	AUCCCCUCCAAUCCCCUUUGA	||||x|||||||||||||oo~	UAGGAGAGGUUAGGGGAAGUU	2	3	0.780435	No
	GRMZM2G071877_T01	CUCCAAUCCAAUCCCCUUCGA	~|||xx|||||||||||||o|	UAGGAGAGGUUAGGGGAAGUU	2.5	3	0.80543	protein serine/threonine kinase activity
	GRMZM2G071877_T03	CUCCAAUCCAAUCCCCUUCGA	~|||xx|||||||||||||o|	UAGGAGAGGUUAGGGGAAGUU	2.5	3	0.80543	protein serine/threonine kinase activity
	GRMZM2G314647_T01	AAUCUCUCCAAUCUCCUUCAA	|xo||||||||||o||||||~	UAGGAGAGGUUAGGGGAAGUU	2	2.5	0.931646	actin cytoskeleton
	GRMZM2G053023_T01	AACCUCUUCAAUCCCCUUCUA	|x|||||o|||||||||||x~	UAGGAGAGGUUAGGGGAAGUU	2.5	3.5	0.898795	Thioredoxin H-type 5
	GRMZM2G067985_T02	UUCCAUCUCAAUCCCUUUCAA	~|||xoxo|||||||o|||||	UAGGAGAGGUUAGGGGAAGUU	3.5	4	0.765903	protein binding
	GRMZM2G067985_T03	UUCCAUCUCAAUCCCUUUCAA	~|||xoxo|||||||o|||||	UAGGAGAGGUUAGGGGAAGUU	3.5	4	0.765903	protein binding
	GRMZM2G062613_T01	CUCCGCUCUGAUCCCCUUCAG	~|||x|||oo||||||||||o	UAGGAGAGGUUAGGGGAAGUU	2.5	3.5	0.744235	catalytic activity
	GRMZM2G058078_T01	AUCCGUAUUAAUCCCCUUCAA	||||xoxoo|||||||||||~	UAGGAGAGGUUAGGGGAAGUU	3.5	4	0.760309	No
	GRMZM2G058078_T02	AUCCGUAUUAAUCCCCUUCAA	||||xoxoo|||||||||||~	UAGGAGAGGUUAGGGGAAGUU	3.5	4	0.760309	No
	GRMZM2G152549_T01	AUCCUCACCAAUCCCCUUCUU	||||||x||||||||||||x~	UAGGAGAGGUUAGGGGAAGUU	2	3	0.83524	No
	GRMZM2G001033_T01	AUCUUCUCCAAUUUCUUUCAU	|||o||||||||oo|o||||~	UAGGAGAGGUUAGGGGAAGUU	2	3.5	0.947826	carbohydrate transport
	GRMZM2G001033_T02	AUCUUCUCCAAUUUCUUUCAU	|||o||||||||oo|o||||~	UAGGAGAGGUUAGGGGAAGUU	2	3.5	0.947826	carbohydrate transport
	GRMZM2G001033_T03	AUCUUCUCCAAUUUCUUUCAU	|||o||||||||oo|o||||~	UAGGAGAGGUUAGGGGAAGUU	2	3.5	0.947826	carbohydrate transport
	GRMZM2G001033_T04	AUCUUCUCCAAUUUCUUUCAU	|||o||||||||oo|o||||~	UAGGAGAGGUUAGGGGAAGUU	2	3.5	0.947826	carbohydrate transport
	GRMZM2G160041_T06	AUCCUCACAAAUUCCCUUCAA	||||||x|x|||o|||||||~	UAGGAGAGGUUAGGGGAAGUU	2.5	4	0.758974	No
	GRMZM2G007475_T01	AUCUGCUCCGAUCCCCUUCAA	|||ox||||o||||||||||~	UAGGAGAGGUUAGGGGAAGUU	2	2.5	0.809211	response to freezing
	GRMZM2G134753_T01	AUCCUCCUCAAUCUCCUUCAA	||||||xo|||||o||||||~	UAGGAGAGGUUAGGGGAAGUU	2	2.5	0.801909	No
	GRMZM2G134753_T02	AUCCUCCUCAAUCUCCUUCAA	||||||xo|||||o||||||~	UAGGAGAGGUUAGGGGAAGUU	2	2.5	0.801909	No
	GRMZM5G814314_T02	AUCUCCUCCAAUCCCCUUCGA	|||ox||||||||||||||o~	UAGGAGAGGUUAGGGGAAGUU	2	2.5	0.805252	post-translational protein modification
	GRMZM2G049076_T01	AUCCUCUCCAAUCCCCUUUUA	||||||||||||||||||ox~	UAGGAGAGGUUAGGGGAAGUU	1.5	3	0.963942	sucrose metabolic process
	GRMZM2G040642_T01	AUCCUUUCCAAUCCCUUCCAA	|||||o|||||||||o|x||~	UAGGAGAGGUUAGGGGAAGUU	2	3.5	0.830508	protein serine/threonine phosphatase activity
	GRMZM2G040642_T02	AUCCUUUCCAAUCCCUUCCAA	|||||o|||||||||o|x||~	UAGGAGAGGUUAGGGGAAGUU	2	3.5	0.830508	protein serine/threonine phosphatase activity
	GRMZM2G014154_T01	UUUUUUUCCAAUCCCCUCCAA	~|oo|o|||||||||||x|||	UAGGAGAGGUUAGGGGAAGUU	2.5	3.5	0.812987	two-component signal transduction system (phosphorelay)
	GRMZM2G014154_T02	UUUUUUUCCAAUCCCCUCCAA	~|oo|o|||||||||||x|||	UAGGAGAGGUUAGGGGAAGUU	2.5	3.5	0.812987	two-component signal transduction system (phosphorelay)
	GRMZM2G014154_T03	UUUUUUUCCAAUCCCCUCCAA	~|oo|o|||||||||||x|||	UAGGAGAGGUUAGGGGAAGUU	2.5	3.5	0.812987	two-component signal transduction system (phosphorelay)
	GRMZM2G014154_T04	UUUUUUUCCAAUCCCCUCCAA	~|oo|o|||||||||||x|||	UAGGAGAGGUUAGGGGAAGUU	2.5	3.5	0.812987	two-component signal transduction system (phosphorelay)
zma-miRn19a-d	GRMZM2G034551_T01	UAGCCCCUCCAAUCCCCUCC	|||||||||||||x||||||	AUCGGGGAGGUUAAGGGAGG	1	2	0.86037	zinc ion transport
	GRMZM2G412793_T01	AAGCCAAUCCAAUUUCCUCC	x||||xx|||||||o|||||	AUCGGGGAGGUUAAGGGAGG	3.5	4	0.884319	No
	GRMZM2G062772_T01	UAGUCCCUCCAAUUCACUUC	|||o|||||||||||x||o|	AUCGGGGAGGUUAAGGGAGG	2	3.5	0.855696	calcium/calmodulin dependent protein kinase-like
	GRMZM2G577735_T01	AAGCCAAUCCAAUUUCCUCC	x||||xx|||||||o|||||	AUCGGGGAGGUUAAGGGAGG	3.5	4	0.884319	No
	GRMZM2G098331_T01	UAGUUCCUUCAAUCCCCUCC	|||oo|||o||||x||||||	AUCGGGGAGGUUAAGGGAGG	2.5	4	0.801435	transporter activity
	GRMZM2G098331_T02	UAGUUCCUUCAAUCCCCUCC	|||oo|||o||||x||||||	AUCGGGGAGGUUAAGGGAGG	2.5	4	0.801435	transporter activity
	GRMZM2G396752_T02	UCACACCUUCAAUUCCCUCC	|xx|x|||o|||||||||||	AUCGGGGAGGUUAAGGGAGG	3.5	4	0.766265	No
	GRMZM2G078396_T01	UAACAACUCCAAUUCCCUUC	||x|xx||||||||||||o|	AUCGGGGAGGUUAAGGGAGG	3.5	4	0.774457	60S ribosomal protein L23
	GRMZM2G078396_T02	UAACAACUCCAAUUCCCUUC	||x|xx||||||||||||o|	AUCGGGGAGGUUAAGGGAGG	3.5	4	0.774457	structural constituent of ribosome
	GRMZM2G053284_T01	UAACUCCUUCAAUUCCUUCC	||x|o|||o|||||||o|||	AUCGGGGAGGUUAAGGGAGG	2.5	3.5	0.859459	actin-7
	GRMZM2G380668_T01	UAGCCCCUCCAAUCCCCUCU	|||||||||||||x|||||o	AUCGGGGAGGUUAAGGGAGG	1.5	2.5	0.856842	dicarboxylic acid transport
	GRMZM2G033379_T02	UAUCCCCUCCAAUCCCCUCC	||x||||||||||x||||||	AUCGGGGAGGUUAAGGGAGG	2	3	0.762313	heat shock protein binding
	GRMZM2G135651_T01	UAGCCCCUCCAAUUCUCUCC	|||||||||||||||o||||	AUCGGGGAGGUUAAGGGAGG	0.5	1	0.979638	ion channel activity
	GRMZM2G004784_T01	UAGCCCCUCCAACCCCCUCC	||||||||||||xx||||||	AUCGGGGAGGUUAAGGGAGG	2	4	0.78501	No
	GRMZM2G062024_T01	UUCCGCCUCCGAUUCCCUCC	|xx|x|||||o|||||||||	AUCGGGGAGGUUAAGGGAGG	3.5	4	0.760593	response to freezing
	GRMZM2G107575_T01	UAUGCCCUCCAAUUCACUCC	||xx|||||||||||x||||	AUCGGGGAGGUUAAGGGAGG	3	4	0.73445	calcineurin B-like protein (CBL1)
	GRMZM2G107575_T02	UAUGCCCUCCAAUUCACUCC	||xx|||||||||||x||||	AUCGGGGAGGUUAAGGGAGG	3	4	0.73445	calcium ion binding
	GRMZM2G059496_T01	UAGUCACUCCAAUUUCCUUC	|||o|x||||||||o|||o|	AUCGGGGAGGUUAAGGGAGG	2.5	3.5	0.830189	No
	GRMZM2G055116_T01	UAGCCCCUUCAAUUCUCUCC	||||||||o||||||o||||	AUCGGGGAGGUUAAGGGAGG	1	2	0.966507	No
	GRMZM2G050709_T01	UAGUCUCUCUAAUUUUCUCC	|||o|o|||o||||oo||||	AUCGGGGAGGUUAAGGGAGG	2.5	4	0.923513	No
	GRMZM2G381453_T06	UAGCCCUUUCAAUCCCCUCU	||||||o|o||||x|||||o	AUCGGGGAGGUUAAGGGAGG	2.5	4	0.822014	transporter activity
	GRMZM2G083374_T01	UAGCCUCUUCAAUUCCUUUU	|||||o||o|||||||o|oo	AUCGGGGAGGUUAAGGGAGG	2.5	4	0.952113	No
	GRMZM2G083374_T02	UAGCCUCUUCAAUUCCUUUU	|||||o||o|||||||o|oo	AUCGGGGAGGUUAAGGGAGG	2.5	4	0.952113	No
	GRMZM5G839411_T01	AGGUCCCUCCAAUUCCCACC	xo|o|||||||||||||x||	AUCGGGGAGGUUAAGGGAGG	3	4	0.819565	transmembrane transport
	GRMZM5G839411_T02	AGGUCCCUCCAAUUCCCACC	xo|o|||||||||||||x||	AUCGGGGAGGUUAAGGGAGG	3	4	0.819565	transmembrane transport
	GRMZM2G109464_T01	UAGCCCCUUCAAUCCUCUCC	||||||||o||||x|o||||	AUCGGGGAGGUUAAGGGAGG	2	4	0.81448	Zinc finger protein
	GRMZM2G109464_T02	UAGCCCCUUCAAUCCUCUCC	||||||||o||||x|o||||	AUCGGGGAGGUUAAGGGAGG	2	4	0.81448	zinc ion binding
	GRMZM2G094699_T02	UAGCCCCUCCAAUUCUCCCA	|||||||||||||||o|x|x	AUCGGGGAGGUUAAGGGAGG	2.5	4	0.886918	No
	GRMZM2G151223_T01	UAGCCCGUCCAAUCCCCUUC	||||||x||||||x||||o|	AUCGGGGAGGUUAAGGGAGG	2.5	4	0.76044	two-component signal transduction system (phosphorelay)
zma-miRn20a/b	GRMZM2G058655_T03	UAACUAUUAGCUCUAGUGCAU	||||o|||||||||||||||~	AUUGGUAAUCGAGAUCACGUA	0.5	0.5	0.992	No
	GRMZM2G058655_T05	UAACUAUUAGCUCUAGUGCAU	||||o|||||||||||||||~	AUUGGUAAUCGAGAUCACGUA	0.5	0.5	0.992	No
	GRMZM2G013936_T02	UAAAAAUUAGCUCUAGUGCAU	|||xx|||||||||||||||~	AUUGGUAAUCGAGAUCACGUA	2	2	0.913295	protein binding
	GRMZM2G045987_T01	UAAGUAUUAGCUCUAGUGCAU	|||xo|||||||||||||||~	AUUGGUAAUCGAGAUCACGUA	1.5	1.5	0.888	protein binding
	GRMZM5G836028_T01	UAACUAUUAGUUCUAGUGCAU	||||o|||||o|||||||||~	AUUGGUAAUCGAGAUCACGUA	1	1.5	0.991453	No
	GRMZM2G155733_T01	UAACUAUUAGCACUAGUGCAU	||||o||||||x||||||||~	AUUGGUAAUCGAGAUCACGUA	1.5	2.5	0.847185	No
	GRMZM2G427486_T01	UAACUUUUAGCUCUAGUGUAU	||||ox||||||||||||o|~	AUUGGUAAUCGAGAUCACGUA	2	2.5	0.899713	No
	GRMZM2G455978_T01	UAAAUAUUAGCUCUAGUGCAU	|||xo|||||||||||||||~	AUUGGUAAUCGAGAUCACGUA	1.5	1.5	0.903409	actin cytoskeleton
	GRMZM2G089876_T01	UAAUUAUUAGCUCUAGUGCAU	|||oo|||||||||||||||~	AUUGGUAAUCGAGAUCACGUA	1	1	0.988636	No
	GRMZM2G066981_T01	UAACUAUUAGUUUUAGUGCAU	||||o|||||o|o|||||||~	AUUGGUAAUCGAGAUCACGUA	1.5	2.5	0.993827	regulation of transcription from RNA polymerase II promoter
	GRMZM2G066981_T02	UAACUAUUAGUUUUAGUGCAU	||||o|||||o|o|||||||~	AUUGGUAAUCGAGAUCACGUA	1.5	2.5	0.993827	Cofactor required for Sp1 transcriptional activation subunit 9
	GRMZM2G066981_T06	UAACUAUUAGUUUUAGUGCAU	||||o|||||o|o|||||||~	AUUGGUAAUCGAGAUCACGUA	1.5	2.5	0.993827	Cofactor required for Sp1 transcriptional activation subunit 9
	GRMZM2G027546_T01	AAACUAUUGGUUCUAGUGCAU	~|||o|||o|o||||||||||	AUUGGUAAUCGAGAUCACGUA	1.5	2.5	0.93188	post-translational protein modification
	GRMZM2G027546_T02	AAACUAUUGGUUCUAGUGCAU	~|||o|||o|o||||||||||	AUUGGUAAUCGAGAUCACGUA	1.5	2.5	0.93188	post-translational protein modification
	GRMZM2G039113_T01	UAACUAUUAGCUCUAGUGGAU	||||o|||||||||||||x|~	AUUGGUAAUCGAGAUCACGUA	1.5	2.5	0.867374	microtubule-binding protein TANGLED1
	GRMZM2G147256_T01	UAACUAUUAACUCUAGUGCAU	||||o||||x||||||||||~	AUUGGUAAUCGAGAUCACGUA	1.5	2.5	0.871795	lyase activity
	GRMZM2G091397_T02	UAACUAUUAGUUCUAGUGCAU	||||o|||||o|||||||||~	AUUGGUAAUCGAGAUCACGUA	1	1.5	0.991453	hydrolase activity
	GRMZM2G086583_T01	UAACUAAUAGUUUUAGUGCAU	||||o|x|||o|o|||||||~	AUUGGUAAUCGAGAUCACGUA	2.5	3.5	0.87963	post-translational protein modification
	GRMZM2G002859_T01	UAACUAUUAGUUUUAGUGCAU	||||o|||||o|o|||||||~	AUUGGUAAUCGAGAUCACGUA	1.5	2.5	0.993827	No
	GRMZM2G023438_T01	UAACUAUUAGUUUUAGUGUAU	||||o|||||o|o|||||o|~	AUUGGUAAUCGAGAUCACGUA	2	3.5	0.993421	importin alpha-1b subunit
	GRMZM2G023438_T02	UAACUAUUAGUUUUAGUGUAU	||||o|||||o|o|||||o|~	AUUGGUAAUCGAGAUCACGUA	2	3.5	0.993421	importin alpha-1b subunit
	GRMZM2G023438_T03	UAACUAUUAGUUUUAGUGUAU	||||o|||||o|o|||||o|~	AUUGGUAAUCGAGAUCACGUA	2	3.5	0.993421	importin alpha-1b subunit
	GRMZM2G016997_T01	UAACUAUUAGUUCUAGUGCAU	||||o|||||o|||||||||~	AUUGGUAAUCGAGAUCACGUA	1	1.5	0.991453	No
	GRMZM2G063188_T03	UAUUCAUAAGCUCUGGUGCAG	||xo|||x||||||o|||||~	AUUGGUAAUCGAGAUCACGUA	3	3.5	0.738272	No
